# Supplementary material for: Time Course of Leptin in Patients with Anorexia Nervosa during Inpatient Treatment: Longitudinal Relationships to BMI and Psychological Factors
Source: PLoS One. 2016 Dec 28;11(12):e0166843. doi: 10.1371/journal.pone.0166843 (PMC5193359; doi:10.1371/journal.pone.0166843)
Supplement: S1 File — (XLSX) [file pone.0166843.s001.xlsx]

## Sheet: Leptin_data
condition	ID	severity	BMI_compared_last	BMI_compared_first	LEPTIN_satt_compared_first	LEPTIN_satt_compared_last	age
control	K001LM		20.66	20.66	6.7	6.7	20.6111
control	K002AG		18.38	18.38	4.4	4.4	27.8694
control	K003HH		22.04	22.04	11.1	11.1	34.3722
control	K004VA		18.07	18.07	1.7	1.7	29.825
control	K005SM		22.84	22.84	18.2	18.2	21.8556
control	K006AR		21.05	21.05	5.8	5.8	26.6611
control	K007MM		18.04	18.04	1.6	1.6	38.1083
control	K008MA		20.48	20.48	10.3	10.3	25.7917
control	K009AW		22.86	22.86	22.2	22.2	25.55
control	K010AD		22.32	22.32	6.1	6.1	24.5139
control	K011AB		20.19	20.19	9	9	26.5
control	K012AP		21.45	21.45	10.4	10.4	29.9667
control	K013NS		22.14	22.14	5.2	5.2	32.8389
control	K014JS		18.42	18.42	2.1	2.1	21.0917
control	K015DB		20.55	20.55	12.2	12.2	26.2472
control	K016FS		21.45	21.45	6.6	6.6	26.8917
control	K017KK		25	25	8.7	8.7	30.1806
control	K018EU		24.69	24.69	20.6	20.6	28.8444
control	K019AN		22.98	22.98	8.8	8.8	25.7389
control	K020SM		22.57	22.57	4.6	4.6	29.6583
control	K021WC		20.44	20.44	12.3	12.3	24.7278
control	K022JK		19.96	19.96	12.7	12.7	28.4944
control	K023MB		21.97	21.97	10.7	10.7	26.4972
control	K024SH		20.82	20.82	7.9	7.9	27.9583
control	K025MK		21.08	21.08	2.9	2.9	46.75
AN	TS_8	HSS	18.8	13.6	1	14.6	22
AN	TS_9	HSS	15.4	12.8	0.3		29
AN	TS_11	HSS	18.6	14	0.8	11.2	21
AN	TS_13	HSS	17.8	14.7	0.2	1.6	30
AN	TS_15	HSS	18.6	12.3	0.4	15.4	20
AN	TS_16	HSS	14.5	13	0.1	0.9	25
AN	TS_17	HSS	16	14.1	0.2	0.8	21
AN	TS_20	HSS	15.1	12.3	0.8	1.9	19
AN	TS_25	HSS	16.1	11.8	0.1	0.9	27
AN	TS_26	HSS	19	15.2	0.7	3.6	23
AN	TS_28	HSS	17.1	15.7	3	2.8	20
AN	TS_1	LSS	16.8	16.3	0.9	2.4	28
AN	TS_4	LSS	17.7	17.1	1.1	3.7	23
AN	TS_5	LSS	17.4	17.5	2.5	2.8	24
AN	TS_6	LSS	18.4	16.2	0.8	3.8	18
AN	TS_7	LSS	16.7	16.8	9.7	5.9	21
AN	TS_12	LSS	16.4	15.8	1.4	2.5	32
AN	TS_22	LSS	16.8	14.4	0.1	4	23
AN	TS_24	LSS	17.4	15.8	0.1	1.6	23
AN	TS_27	LSS	16	15.9	1.6	0.8	23
